## CORRECTION

# Correction: GAN-WGCNA: Calculating gene modules to identify key intermediate regulators in cocaine addiction

Taehyeong Kim, Kyoungmin Lee, Mookyung Cheon, Wookyung Yu

There are errors in the Funding statement. The correct funding statement is as follows: This work is supported by the RandD programs of DGIST (22-CoE-BT-01), funded by the Ministry of Science and ICT of Korea. This research is supported by the KBRI Basic Research Program through the Korea Brain Research Institute, funded by the Ministry of Science and ICT (24-BR-02-04 [MC]) and the National Research Foundation of Korea (NRF) grant funded by the Korea government (MSIT) (2021R1A2C1003657 [TK,KL,MC] NRF-2023R1A2C1006248(WY)). The funders have no role in study design, data collection and analysis, decision to publish, or preparation of the manuscript.

## Reference

1. Kim T, Lee K, Cheon M, Yu W. GAN-WGCNA: calculating gene modules to identify key intermediate regulators in cocaine addiction. PLoS One. 2024;19(10):e0311164. <https://doi.org/10.1371/journal.pone.0311164> PMID: [39361596](https://pubmed.ncbi.nlm.nih.gov/39361596/)

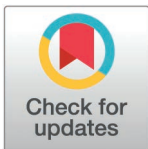

## OPEN ACCESS

**Citation:** Kim T, Lee K, Cheon M, Yu W (2025) Correction: GAN-WGCNA: Calculating gene modules to identify key intermediate regulators in cocaine addiction. PLoS ONE 20(3): e0320886. <https://doi.org/10.1371/journal.pone.0320886>

**Published:** March 21, 2025

**Copyright:** © 2025 Kim et al. This is an open access article distributed under the terms of the [Creative Commons Attribution License](https://creativecommons.org/licenses/by/4.0/), which permits unrestricted use, distribution, and reproduction in any medium, provided the original author and source are credited.

**Funding:** None declared.
